## Early and chronic phased local coagulative responses following bioresorbable-polymer drug-eluting stent implantation

K. Yamaguchi, T. Wakatsuki, Y. Okushi, K. Suto, K. Matsumoto, T. Takahashi, M. Kadota, Y. Kawabata, T. Matsuura, T. Ise, K. Kusunose, S. Yagi, H. Yamada, T. Soeki, M. Sata

*Department of Cardiovascular Medicine, Tokushima University Hospital, Tokushima, Japan*

**Funding Acknowledgement:** Type of funding sources: None.

**Background:** Neointimal maturation after bioresorbable-polymer (BP) drug-eluting stent (DES) implantation will not be complete in the absorption phase of the polymer. We have previously reported local persistent hypercoagulation after sirolimus-eluting stent (SES) implantation by measuring local plasma prothrombin fragment 1+2 (F1+2) levels. The aim of this study is to examine time-dependent local coagulative response after BP-DES implantation.

**Methods:** Sixty-four patients who were treated about ten months earlier with coronary angioplasty, with no evidence of restenosis, were studied [durable-polymer (DP)-DES {SES; Cypher<sup>®</sup>: 26pts and everolimus-eluting stent (EES); Xience<sup>®</sup>: 16pts} and BP-DES (BP-EES; Synergy<sup>®</sup>: 10pts and BP-SES; Ultimaster<sup>®</sup>: 12pts)]. We measured plasma levels of F1+2 sampled in coronary sinus (CS) and sinus of Valsalva (V) at the early (2±1 months) and chronic (10±2 months) phases. The transcardiac gradient ( $\Delta$ ) was defined as CS level minus V level.

**Results:** No significant differences were observed in the percent diameter stenosis between the DP- and BP-DES groups (11.5±15.5 vs 14.1±11.9%). The  $\Delta$ F1+2 was significantly lower in the BP-DES group than in the DP-DES group at the chronic phase (7.5±16.1 vs 16.4±17.1pmol/l,  $p<0.05$ ). In the BP-DES group, the  $\Delta$ F1+2 did not differ significantly between the early and chronic phases (7.0±14.1 vs 7.5±16.1pmol/l, NS).

**Conclusion:** Lower local coagulative response was observed at the chronic phase after BP-DES implantation compared to DP-DES implantation, and local hypercoagulation after BP-DES implantation was not observed at the early phase compared to the chronic phase. These findings might lead to the possibility of shorter dual antiplatelet therapy after BP-DES implantation.
